# Supplementary material for: NAD+ protects against EAE by regulating CD4+ T-cell differentiation
Source: PubMed Central journal article supplement — Nat Commun. 2014 Oct 7;5:5101. doi: 10.1038/ncomms6101 (PMC4205890; doi:10.1038/ncomms6101), 2014-10-07
Supplement: ncomms6101-s1.pdf [file ncomms6101-s1.pdf]

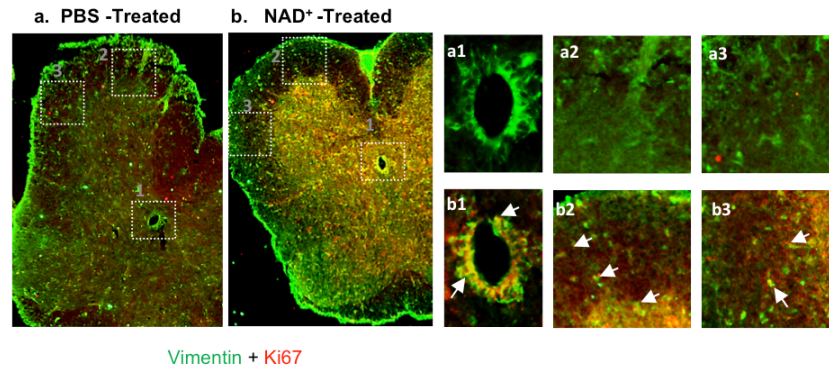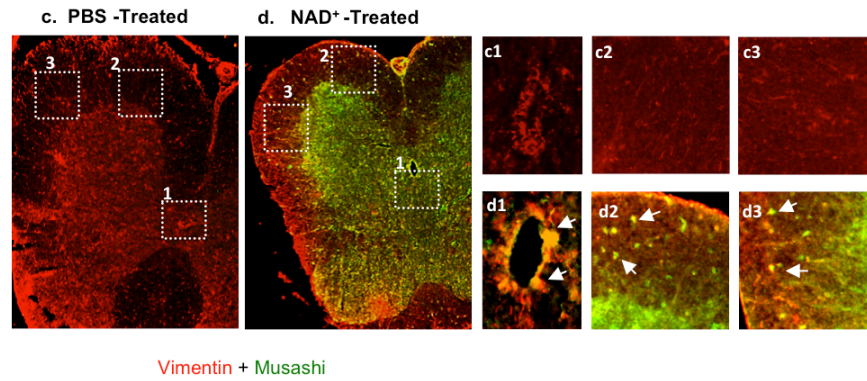

**Supplementary Figure 1: NAD<sup>+</sup> enhances ependymal cell proliferation and Musashi expression.** NAD<sup>+</sup> treatment significantly increased Ki67 (**b**) and Musashi (**d**) labeling in ependymal cell population (1), subependymally and in outer circumference of the spinal cord (2 & 3) when compared to controls (**a**, **c**). Boxed regions in **a-d** have been magnified in a 1-d3 and white arrows depict increased stem cell proliferation. Scale bars: a, 100  $\mu$ m (applies to b-d); a1, 20  $\mu$ m (applies to a2-d3).

# Lymph Nodes

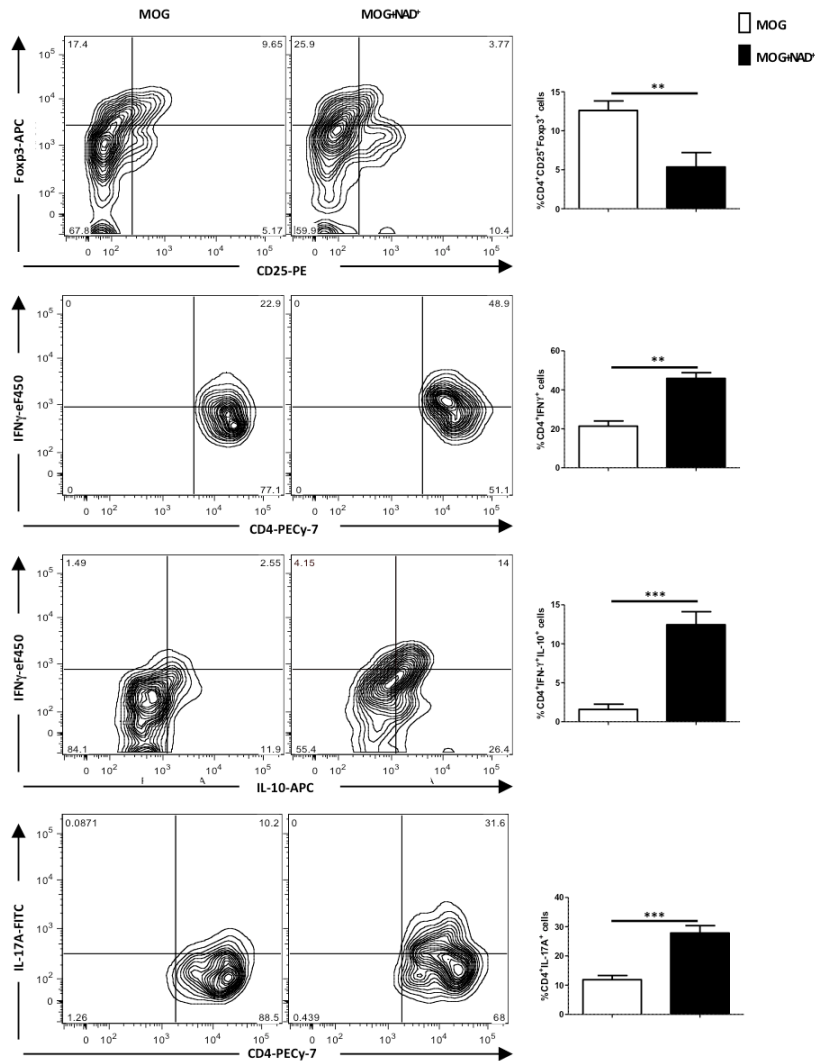

**Supplementary Figure 2: NAD<sup>+</sup> alters immune response in the lymph nodes.** Wild type C57BL/6 mice were subjected to EAE by MOG immunization and treated daily with intraperitoneal injection of 60mg of NAD<sup>+</sup> or a placebo solution (PBS). After 18 days mice were euthanized and CD4<sup>+</sup> T cells were isolated from lymph nodes and stimulated with PMA/ionomycin. Frequencies of CD4<sup>+</sup>IFN $\gamma$ <sup>+</sup>, CD4<sup>+</sup>IFN $\gamma$ <sup>+</sup>IL-10<sup>+</sup> and CD4<sup>+</sup>IL-17A<sup>+</sup> cells were analyzed by flow cytometry. (n=5) p < 0.05; \*\*, p < 0.01; \*\*\*, p < 0.001, n.s., not significant, as determined by Student's t-test, comparing the indicated groups.

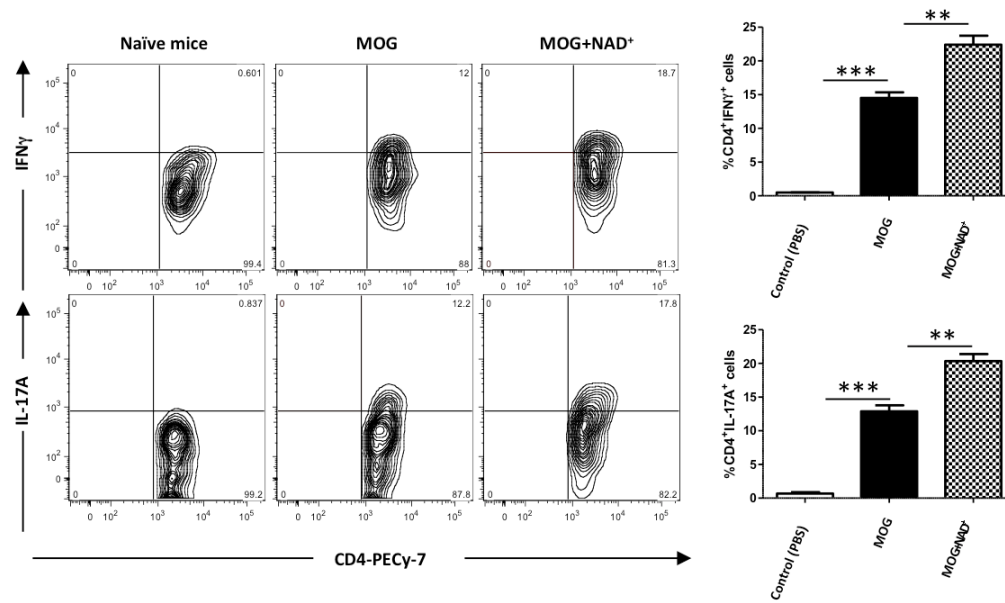

**Supplementary Figure 3: NAD<sup>+</sup> increases systemically CD4<sup>+</sup>IFNγ<sup>+</sup> and CD4<sup>+</sup>IL-17A<sup>+</sup> cells.** Wild type C57BL/6 mice were subjected to EAE by MOG immunization and treated daily with intraperitoneal injection of 60mg of NAD<sup>+</sup> or a placebo solution (PBS). After 18 days mice were euthanized and CD4<sup>+</sup> T cells were isolated from spleens and stimulated with PMA/ionomycin and frequencies of CD4<sup>+</sup>IFNγ<sup>+</sup> and CD4<sup>+</sup>IL-17A<sup>+</sup> cells were analyzed by flow cytometry. (n=5) p < 0.05; \*\*, p < 0.01; \*\*\*, p < 0.001, n.s., not significant, as determined by Student's t-test, comparing the indicated groups.

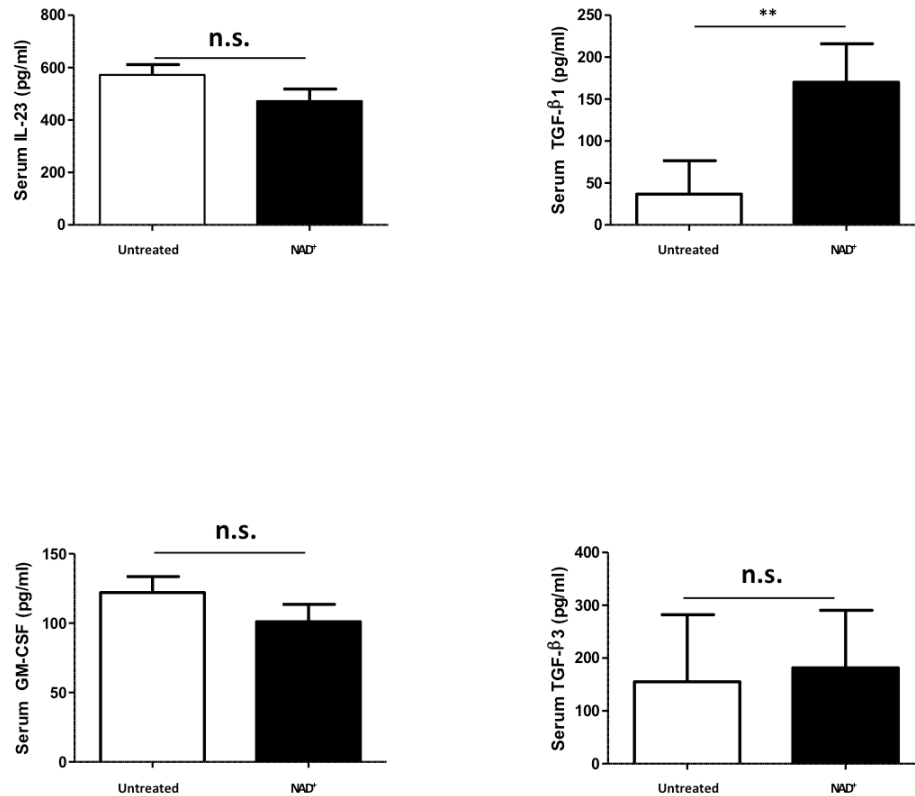

**Supplementary Figure 4: NAD<sup>+</sup> induces a modest systemic increase of TGFβ<sub>1</sub> but not other cytokines.** Wild type C57BL/6 mice were subjected to EAE by MOG immunization and treated daily with intraperitoneal injection of 60mg of NAD<sup>+</sup> or a placebo solution (PBS). After 18 days mice were euthanized and serum levels of IL-23, TGFβ<sub>1</sub>, GM-CSF and TGFβ<sub>3</sub> cytokines were assessed by ELISA. (n=5) \*\*, p < 0.01; n.s., not significant, as determined by Student's t-test, comparing the indicated groups.

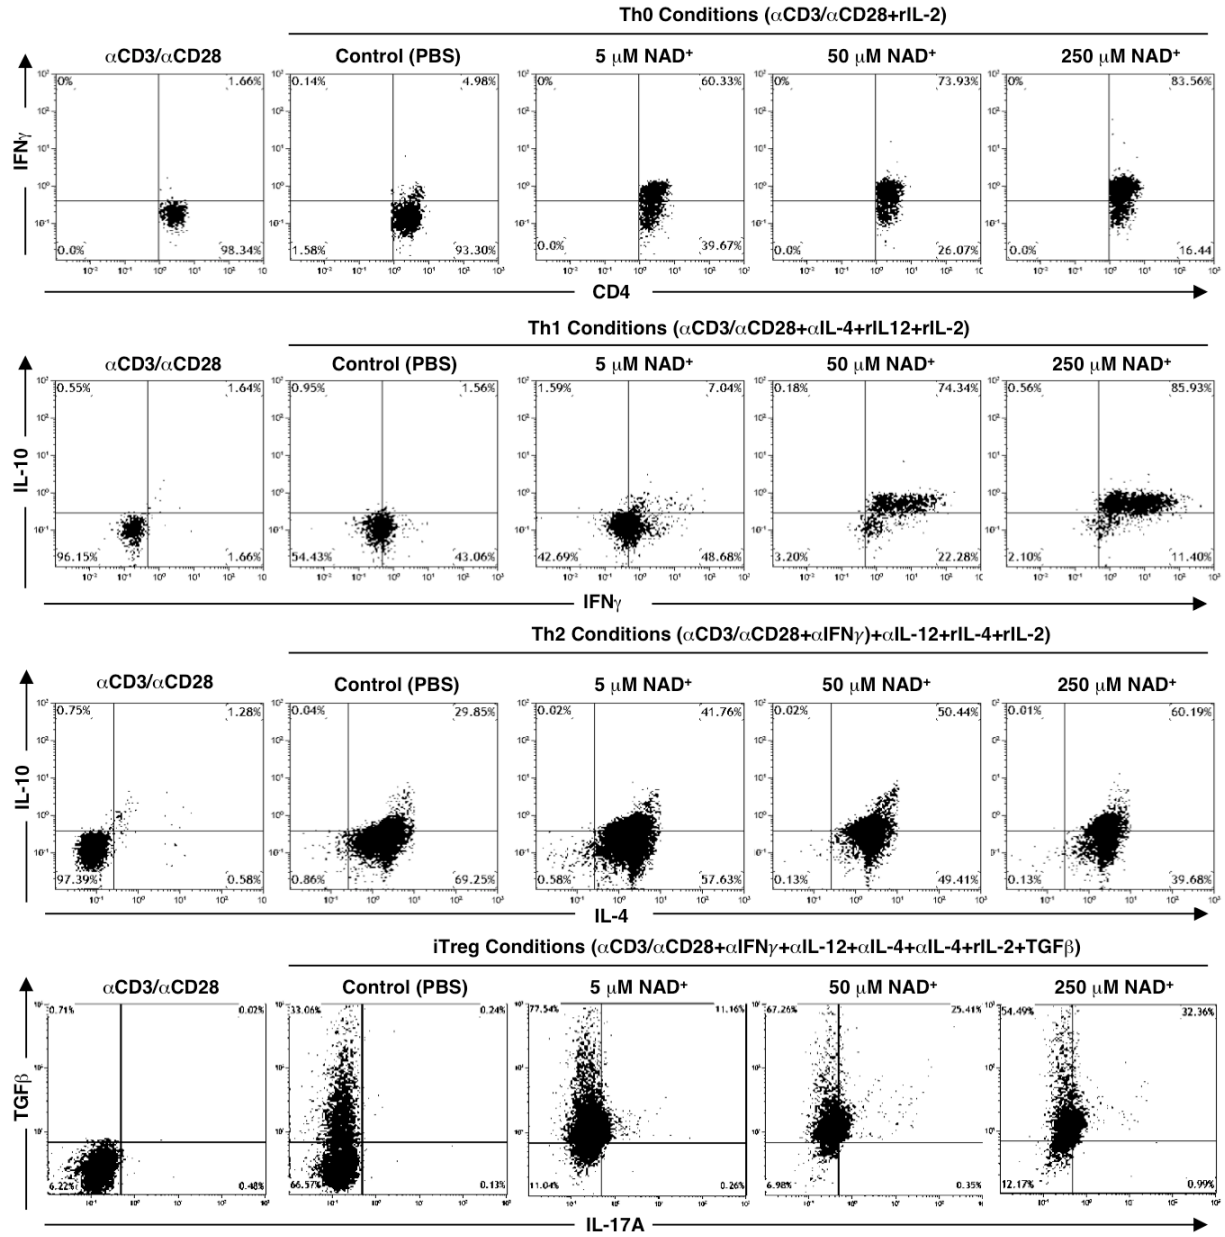

**Supplementary Figure 5: NAD<sup>+</sup> alters CD4<sup>+</sup> T cell differentiation of sorted naïve CD4<sup>+</sup>CD25<sup>+</sup>CD44<sup>low</sup>CD62L<sup>high</sup> cells from wild type mice in different polarizing conditions.** Sorted naïve CD4<sup>+</sup>CD25<sup>+</sup>CD44<sup>low</sup>CD62L<sup>high</sup> T cells were isolated from spleens of wild type mice (C57BL/6 background) and activated with  $\alpha$ -CD3/ $\alpha$ -CD28 antibodies only or in Th0 (recombinant IL-2 cytokine at a concentration of 50ng/ml), Th1, Th2 or iTreg-polarizing conditions. Cells that were cultured in Th0, Th1, Th2, and iTreg polarizing conditions were stimulated with increasing concentrations of NAD<sup>+</sup> (0, 5, 50 and 250 $\mu$ M). After 96 hours, cell frequency of CD4<sup>+</sup>IL-IFN $\gamma$ <sup>+</sup> in Th0, CD4<sup>+</sup>IL-IFN $\gamma$ <sup>+</sup>IL-10<sup>+</sup> in Th1, CD4<sup>+</sup>IL-4<sup>+</sup>IL-10<sup>+</sup> in Th2 and CD4<sup>+</sup>IL-17A<sup>+</sup>TGF $\beta$ <sup>+</sup> in iTreg conditions was measured by flow cytometry by gating on non-apoptotic CD4<sup>+</sup> cells. To set the gates, flow cytometry dot plots were based on comparison with isotype controls, fluorescence minus one (FMO), permeabilized and unpermeabilized unstained cells (n=15; the data derived from three different experiments). n.s.; not significant; \*,  $p < 0.05$ ; \*\*,  $p < 0.01$ ; \*\*\*,  $p < 0.001$ , as determined by Student's t-test, comparing the indicated groups.

### Th0 polarizing conditions

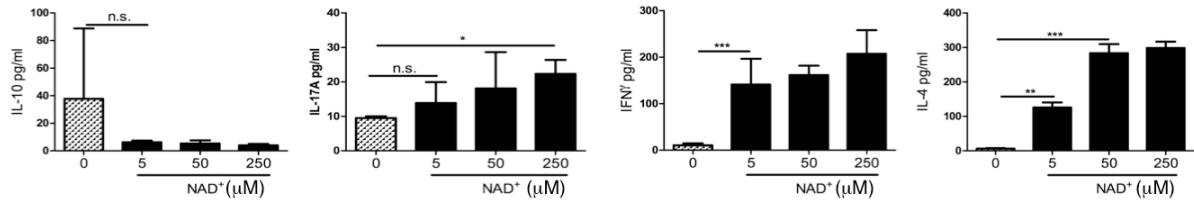

### Th1 polarizing conditions

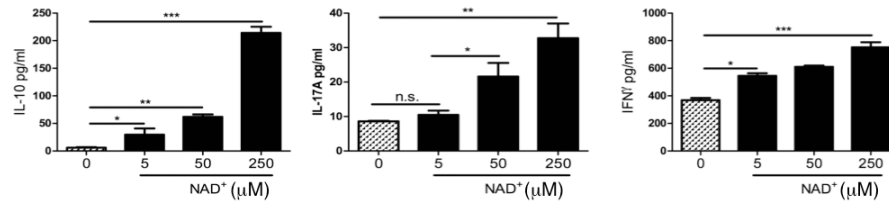

### Th2 polarizing conditions

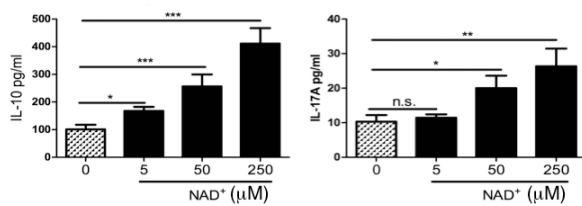

### Th17 polarizing conditions

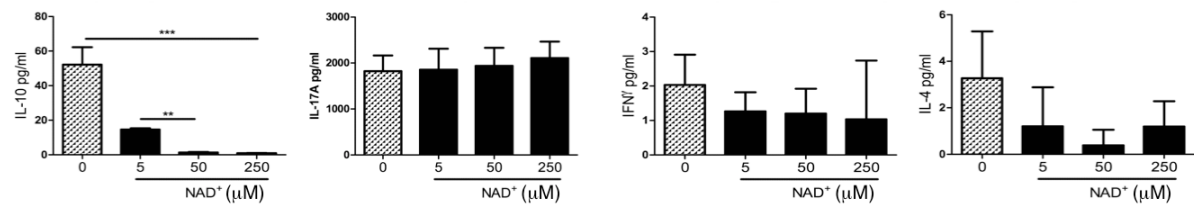

### iTreg polarizing conditions

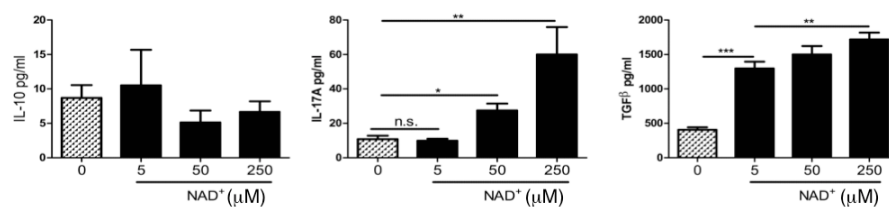

**Supplementary Figure 6: NAD<sup>+</sup> regulates cytokine secretion in different polarizing conditions but not in Th17 conditions.** Sorted naïve CD4<sup>+</sup> T cells were isolated from spleens of 5C.C7 *Rag2*<sup>-/-</sup> mice (C57BL/6 background) and activated with α-CD3/α-CD28 antibodies only or in Th0 (recombinant IL-2 cytokine at a concentration of 50ng/ml), Th1, Th2, Th17 or iTreg-polarizing conditions. Cells that were cultured in Th0, Th1, Th2, Th17 and iTreg polarizing conditions were stimulated with increasing concentrations of NAD<sup>+</sup> (0, 5, 50 and 250μM). After 96 hours, cytokine secretion was assessed by ELISA (n=15; the data derived from three different experiments). n.s.; not significant; \*,  $p < 0.05$ ; \*\*,  $p < 0.01$ ; \*\*\*,  $p < 0.001$ , as determined by Student's t-test, comparing the indicated groups.

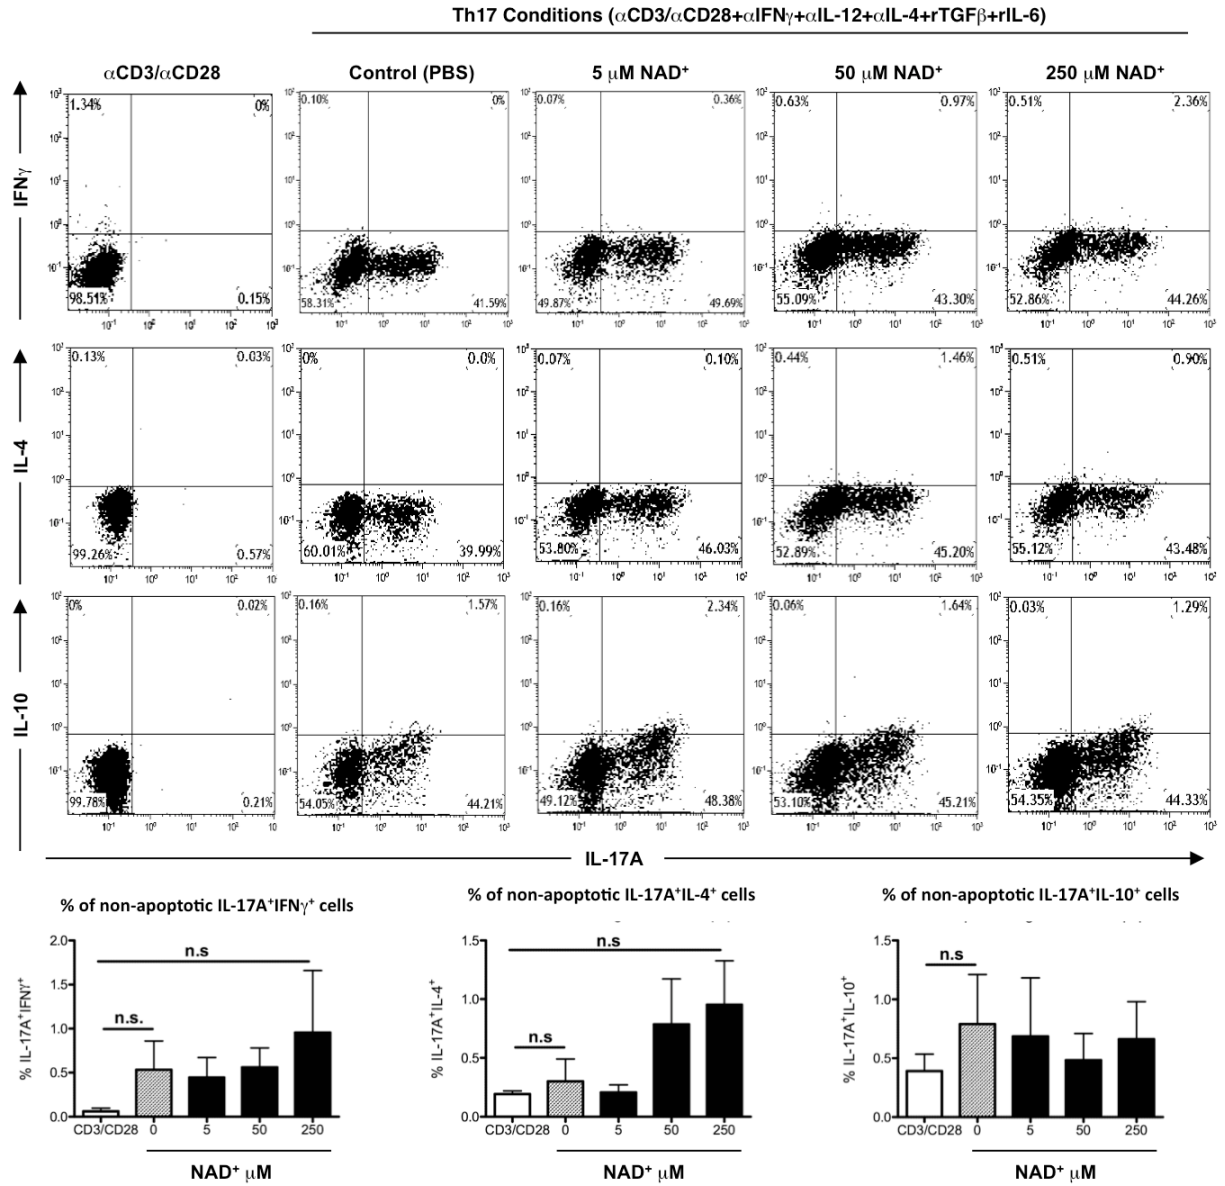

**Supplementary Figure 7: NAD<sup>+</sup> does not affect Th17 differentiation.** Sorted naïve CD4<sup>+</sup> T cells were isolated from spleens of 5C.C7 Rag2<sup>-/-</sup> mice (C57BL/6 background) and were activated with  $\alpha$ -CD3/ $\alpha$ -CD28 antibodies only or in Th17 polarizing conditions (with  $\alpha$ -CD3/ $\alpha$ -CD28, 4ng/ml of recombinant TGF $\beta$  and 100ng/ml of recombinant IL-6, 10 $\mu$ g/ml of anti-IL-4, anti-IL-12 and anti-IFN $\gamma$  antibodies). Cells in Th17 polarizing conditions were cultured in presence of increasing concentrations of NAD<sup>+</sup>. After 96 hours percentage of CD4<sup>+</sup> IL-17A<sup>+</sup> IFN $\gamma$ <sup>+</sup>, CD4<sup>+</sup> IL-17A<sup>+</sup> IL-4<sup>+</sup> IL-10<sup>+</sup> and CD4<sup>+</sup> IL-17A<sup>+</sup> IL-10<sup>+</sup> cells were measured by flow cytometry by gating on non-apoptotic CD4<sup>+</sup> cells. To set the gates, flow cytometry dot plots were based on comparison with isotype controls, fluorescence minus one (FMO), permeabilized and unpermeabilized unstained cells (n=15; the data derived from three different experiments). n.s., not significant. \*,  $p < 0.05$ ; \*\*,  $p < 0.01$ ; \*\*\*,  $p < 0.001$ , as determined by Student's t-test, comparing the indicated groups.

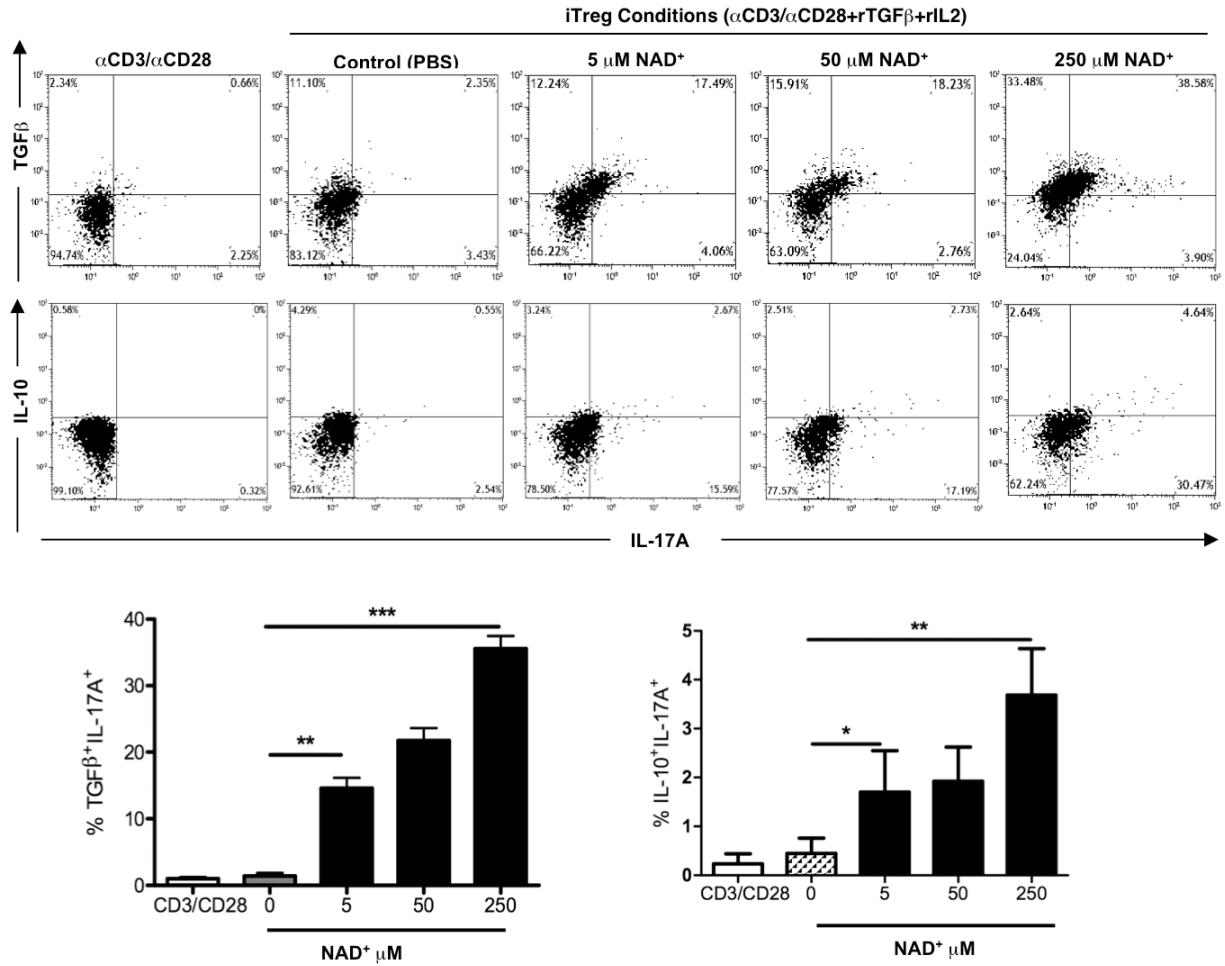

**Supplementary Figure 8: NAD<sup>+</sup> promotes Th17 differentiation in iTreg polarizing conditions.** Sorted naïve CD4<sup>+</sup> T cells were isolated from spleens of 5C.C7 *Rag2*<sup>-/-</sup> mice (C57BL/6 background) and were activated with  $\alpha$ -CD3/ $\alpha$ -CD28 antibodies only or in iTreg polarizing conditions (with  $\alpha$ -CD3/ $\alpha$ -CD28, 4ng/ml of recombinant TGF $\beta$ , 50ng/ml of recombinant IL-2 and 10 $\mu$ g/ml of anti-IL-4, anti-IL-6, anti-IL-12 and anti-IFN $\gamma$  antibodies). Cells in iTreg polarizing conditions were cultured in presence of increasing concentrations of NAD<sup>+</sup>. After 96 hours percentage of CD4<sup>+</sup> IL-10<sup>+</sup>IL-17A<sup>+</sup> and CD4<sup>+</sup> IL-17A<sup>+</sup> TGF $\beta$ <sup>+</sup> cells was measured by flow cytometry by gating on non-apoptotic cells. To set the gates, flow cytometry dot plots were based on comparison with isotype controls, fluorescence minus one (FMO), permeabilized and unpermeabilized unstained cells (n=15; the data derived from three different experiments). n.s., not significant. \*,  $p < 0.05$ ; \*\*,  $p < 0.01$ ; \*\*\*,  $p < 0.001$ , as determined by Student's t-test, comparing the indicated groups.

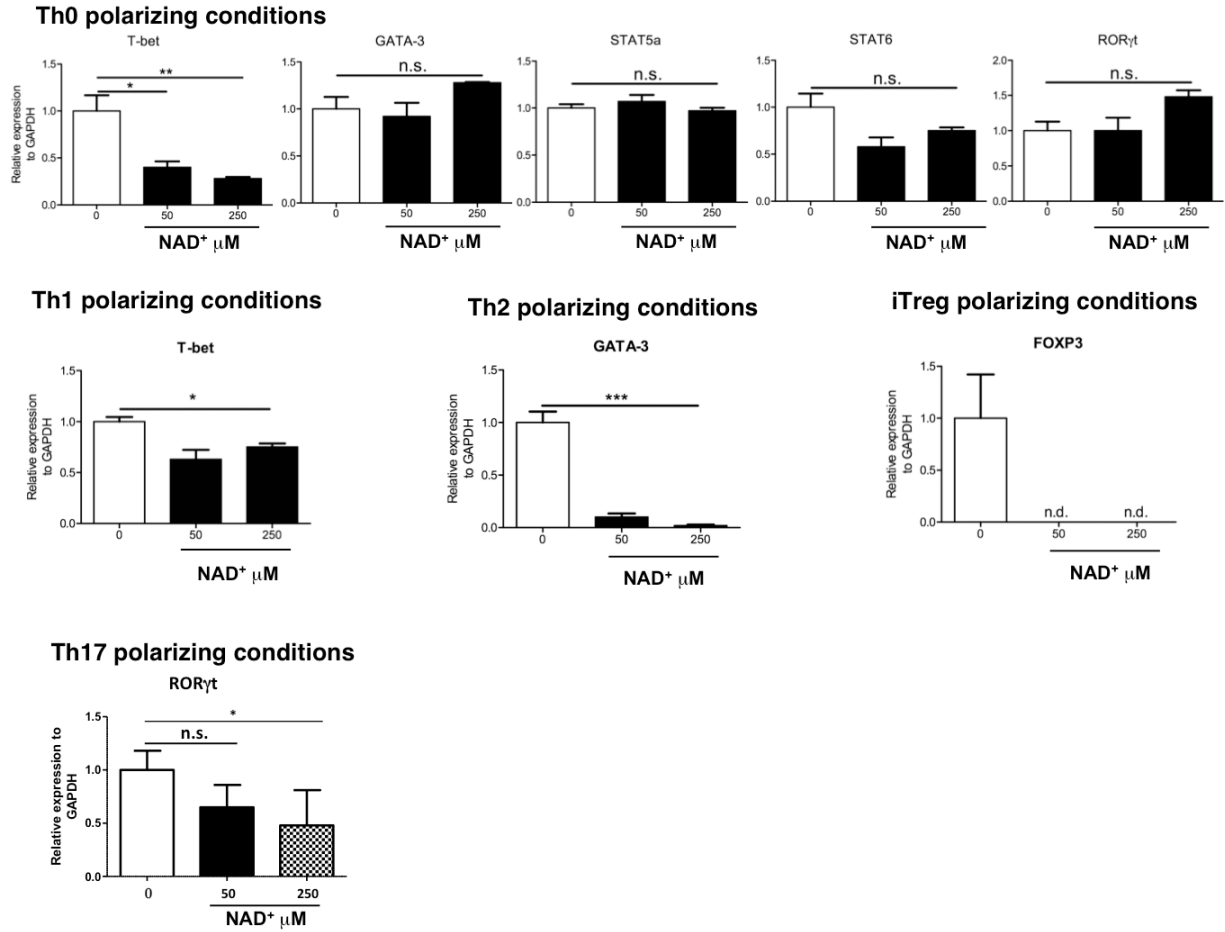

**Supplementary Figure 9: NAD<sup>+</sup> inhibits the expression of well known transcription factors.** *T-bet*, *GATA3*, *STAT5a*, *STAT6*, *ROR $\gamma$ t* and *Foxp3* expression of 5C.C7 *Rag2*<sup>-/-</sup> naïve CD4<sup>+</sup> T cells cultured under Th0, Th1, Th2 and iTreg polarizing conditions and in presence of NAD<sup>+</sup>. After 24 hours of culture, cells were collected and mRNA was extracted. mRNA levels of *T-bet*, *GATA3*, *STAT5a*, *STAT6*, *ROR $\gamma$ t* and *Foxp3* was determined by real-time PCR. Values are expressed as fold expression relative to the house-keeping gene *GAPDH*. (n=15; data derived from three different experiments). \*,  $p < 0.05$ ; \*\*,  $p < 0.01$ ; \*\*\*,  $p < 0.001$ ; n.s., not significant, as determined by Student's t-test, comparing the indicated groups.

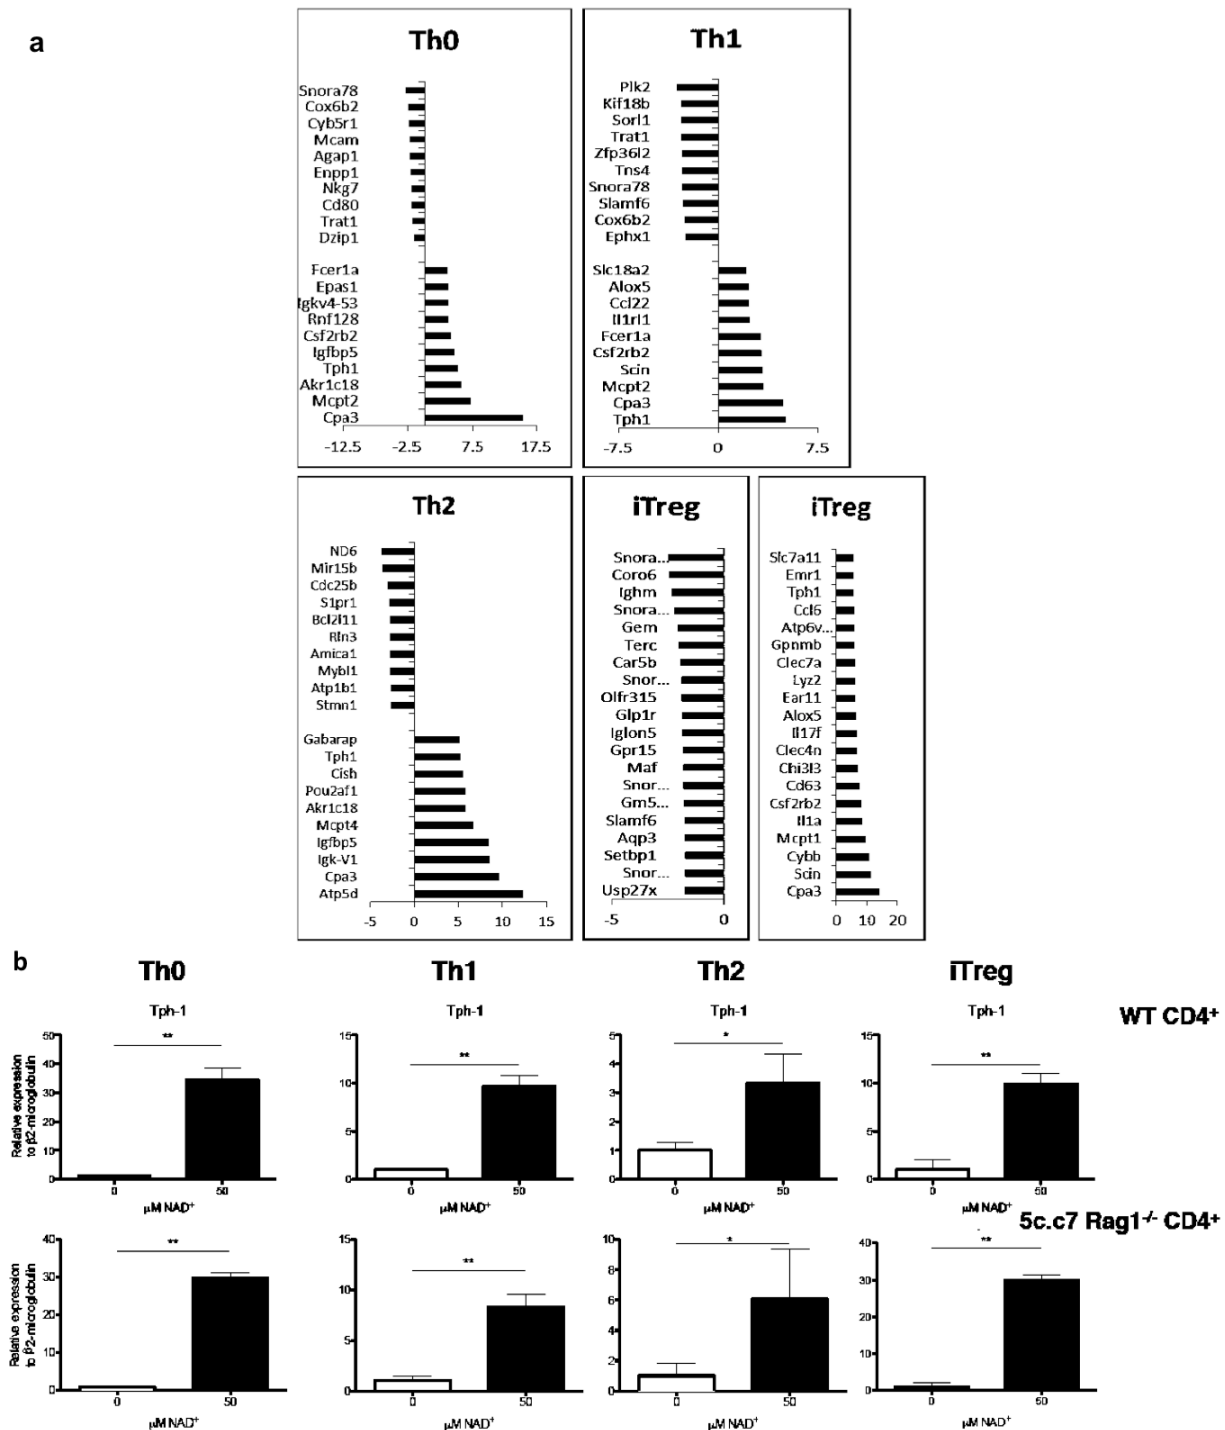

**Supplementary Figure 10: NAD<sup>+</sup> promotes *Tph1* expression.** (a) Microarray analysis of genes up-regulated or down-regulated over two fold in wild type (C57BL/6) naïve CD4<sup>+</sup> T cells under Th0, Th1, Th2 and iTreg conditions after 96 hours of culture and in presence of NAD<sup>+</sup> (50 $\mu$ M) or PBS. Fold change in gene expression following treatment with 50  $\mu$ M of NAD<sup>+</sup> was determined from normalized expression data. Top 10 or 15 differentially regulated genes are shown. (n=3 per condition). (b) *Tph1* expression of wild type (C57BL/6) and 5C.C7 *Rag2*<sup>-/-</sup> (C57BL/6 background) naïve CD4<sup>+</sup> T cells under Th0, Th1, Th2 and iTreg polarizing conditions after 96 hours of culture and in presence of NAD<sup>+</sup> (50 $\mu$ M) or PBS. After 96 hours, cells were collected and mRNA was extracted. mRNA levels of *Tph1* was determined by real-time PCR. Values are expressed as fold expression relative to the house-keeping gene *GAPDH* (n=10; data derived from three different experiments). \*,  $p < 0.05$ ; \*\*,  $p < 0.01$ ; n.s., not significant, as determined by Student's t-test, comparing the indicated groups.

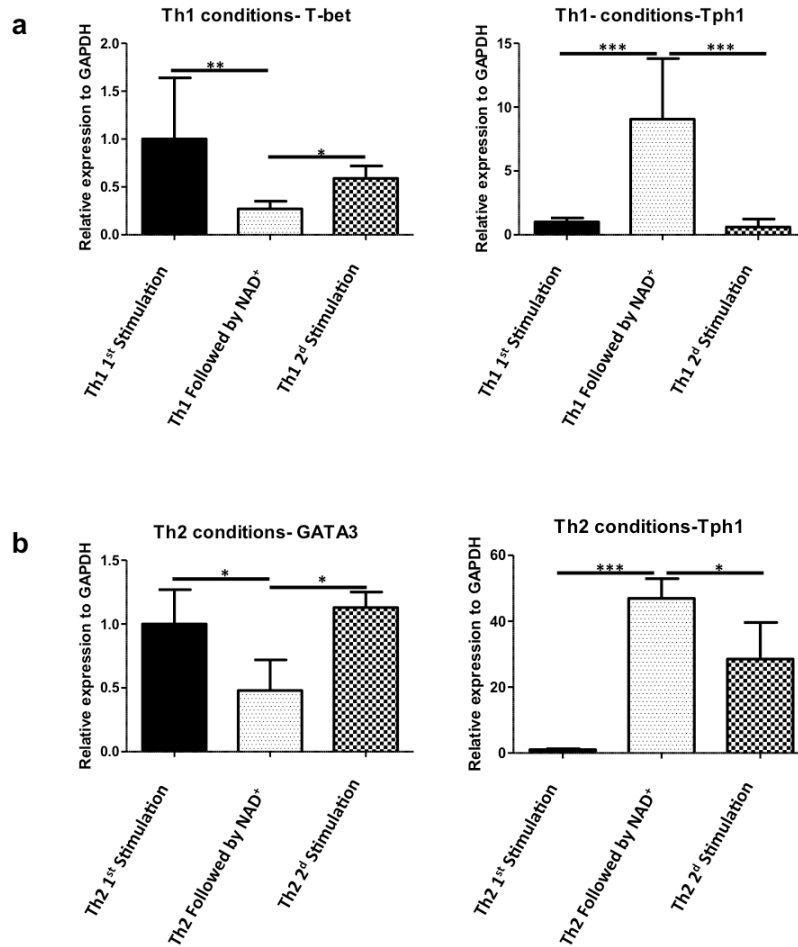

**Supplementary Figure 11: NAD<sup>+</sup> inhibits *T-bet* and *GATA3* expression in polarized Th1 and Th2 cells and increases *Tph1* expression.** Sorted naïve CD4<sup>+</sup> T cells were isolated from spleens of wild type C57BL/6 mice and cultured (0.5x10<sup>6</sup> cells/well) in Th1 **(a)** (with α-CD3/α-CD28, 50ng/ml of recombinant IL-12, 50ng/ml of recombinant IL-2 cytokine and 10μg/ml of anti-IL-4) and Th2 **(b)** (with α-CD3/α-CD28, 50ng/ml of recombinant IL-4, 50ng/ml of recombinant IL-2, 10μg/ml of anti-IL-12 and anti-IFNγ antibodies) polarizing conditions for one week, washed and followed by an incubation period of 72 hours with NAD<sup>+</sup> (100μM). Cells were then rested for 72 hours, before a second Th1 **(a)** and Th2 **(b)** stimulation for 10 days. After each incubation period, cells were collected and mRNA level of *T-bet*, *GATA3* and *Tph1* was assessed by real-time PCR. Values are expressed as fold expression relative to the house-keeping gene *GAPDH* (n=10; data derived from three different experiments). n.s., not significant. \*, p < 0.05; \*\*, p < 0.01; \*\*\*, p < 0.001, as determined by Student's t-test, comparing the indicated groups.

**Th0**

| <i>Ingenuity Canonical Pathways</i>                        | <i>-log(p-value)</i> |
|------------------------------------------------------------|----------------------|
| Eicosanoid Signaling                                       | 2.56E00              |
| VDR/RXR Activation                                         | 2.54E00              |
| Methylglyoxal Degradation III                              | 2.51E00              |
| Androgen Biosynthesis                                      | 2.41E00              |
| Crosstalk between Dendritic Cells and Natural Killer Cells | 2.38E00              |
| Communication between Innate and Adaptive Immune Cells     | 2.37E00              |
| CTLA4 Signaling in Cytotoxic T Lymphocytes                 | 2.36E00              |
| B Cell Development                                         | 2.23E00              |
| Retinoate Biosynthesis I                                   | 2.13E00              |
| iCOS-iCOSL Signaling in T Helper Cells                     | 2.12E00              |
| Serotonin Receptor Signaling                               | 1.98E00              |
| Graft-versus-Host Disease Signaling                        | 1.91E00              |
| Autoimmune Thyroid Disease Signaling                       | 1.87E00              |
| Bile Acid Biosynthesis, Neutral Pathway                    | 1.87E00              |
| Hepatic Fibrosis / Hepatic Stellate Cell Activation        | 1.86E00              |

**Th1**

| <i>Ingenuity Canonical Pathways</i>               | <i>-log(p-value)</i> |
|---------------------------------------------------|----------------------|
| Mitotic Roles of Polo-Like Kinase                 | 3.95E00              |
| Cell Cycle: G2/M DNA Damage Checkpoint Regulation | 3.26E00              |
| IL-10 Signaling                                   | 2.68E00              |
| T Helper Cell Differentiation                     | 2.66E00              |
| IL-3 Signaling                                    | 2.63E00              |
| FLT3 Signaling in Hematopoietic Progenitor Cells  | 2.58E00              |
| Acute Myeloid Leukemia Signaling                  | 2.53E00              |
| Asparagine Biosynthesis I                         | 2.43E00              |
| IL-17A Signaling in Gastric Cells                 | 2.41E00              |
| NRF2-mediated Oxidative Stress Response           | 2.34E00              |
| Serotonin Receptor Signaling                      | 2.17E00              |
| iCOS-iCOSL Signaling in T Helper Cells            | 2.13E00              |
| IL-17A Signaling in Fibroblasts                   | 2.12E00              |
| Molecular Mechanisms of Cancer                    | 2.07E00              |
| April Mediated Signaling                          | 2.05E00              |

**Th2**

| <i>Ingenuity Canonical Pathways</i>                                                                   | <i>-log(p-value)</i> |
|-------------------------------------------------------------------------------------------------------|----------------------|
| Primary Immunodeficiency Signaling                                                                    | 6.78E00              |
| B Cell Development                                                                                    | 3.94E00              |
| FcγRIIB Signaling in B Lymphocytes                                                                    | 3.52E00              |
| Hematopoiesis from Pluripotent Stem Cells                                                             | 3.15E00              |
| Remodeling of Epithelial Adherens Junctions                                                           | 2.68E00              |
| Role of NFAT in Regulation of the Immune Response                                                     | 2.63E00              |
| Phospholipase C Signaling                                                                             | 2.61E00              |
| p70S6K Signaling                                                                                      | 2.59E00              |
| Atherosclerosis Signaling                                                                             | 2.58E00              |
| PI3K Signaling in B Lymphocytes                                                                       | 2.45E00              |
| Altered T Cell and B Cell Signaling in Rheumatoid Arthritis                                           | 2.32E00              |
| Antioxidant Action of Vitamin C                                                                       | 2.16E00              |
| B Cell Receptor Signaling                                                                             | 2.07E00              |
| Differential Regulation of Cytokine Production in Macrophages and T Helper Cells by IL-17A and IL-17F | 2.06E00              |
| Granzyme A Signaling                                                                                  | 2.01E00              |

**iTreg**

| <i>Ingenuity Canonical Pathways</i>                                                                   | <i>-log(p-value)</i> |
|-------------------------------------------------------------------------------------------------------|----------------------|
| Differential Regulation of Cytokine Production in Macrophages and T Helper Cells by IL-17A and IL-17F | 1.13E01              |
| Differential Regulation of Cytokine Production in Intestinal Epithelial Cells by IL-17A and IL-17F    | 1.02E01              |
| Graft-versus-Host Disease Signaling                                                                   | 8.88E00              |
| Altered T Cell and B Cell Signaling in Rheumatoid Arthritis                                           | 7.61E00              |
| Communication between Innate and Adaptive Immune Cells                                                | 7.37E00              |
| T Helper Cell Differentiation                                                                         | 7.29E00              |
| LXR/RXR Activation                                                                                    | 7.01E00              |
| Role of Hypercytokinemia/hyperchemokinaemia in the Pathogenesis of Influenza                          | 6.44E00              |
| Dendritic Cell Maturation                                                                             | 6.42E00              |
| Role of Cytokines in Mediating Communication between Immune Cells                                     | 5.76E00              |
| Atherosclerosis Signaling                                                                             | 5.25E00              |
| IL-10 Signaling                                                                                       | 4.96E00              |
| Role of NFAT in Regulation of the Immune Response                                                     | 4.74E00              |
| Role of Osteoblasts, Osteoclasts and Chondrocytes in Rheumatoid Arthritis                             | 3.88E00              |
| Type I Diabetes Mellitus Signaling                                                                    | 3.8E00               |

**Supplementary Table 1: Ingenuity canonical pathways in naive CD4<sup>+</sup> T cells under different polarizing conditions after 96 hours of culture.** Fold change in gene expression following treatment with NAD<sup>+</sup> (50μM) versus PBS was determined from normalized expression data. Genes that were differentially expressed at least 2-fold were uploaded to IPA analysis and a canonical pathway analysis was performed. Top 15 most affected pathways are shown.
